# Supplementary material for: Self-Supporting Hydrogels Based on Fmoc-Derivatized Cationic Hexapeptides for Potential Biomedical Applications
Source: MDPI journal article supplement (doi:10.3390/biomedicines9060678), 2021-06-15
Supplement: s1 [file s1]

## **Supplementary Materials**

### **Self-supporting hydrogels based on Fmoc-derivatized cationic hexapeptides for potential biomedical applications**

Carlo Diaferia <sup>1,†</sup>, Elisabetta Rosa<sup>1,†</sup>, Enrico Gallo <sup>2</sup>, Giovanni Smaldone <sup>2</sup>, Mariano Stornaiuolo <sup>1</sup>, Giancarlo Morelli <sup>1</sup> and Antonella Accardo <sup>1,\*</sup>

<sup>1</sup>Department of Pharmacy and Research Centre on Bioactive Peptides (CIRPeB), University of Naples “Federico II”, Naples, 80134, Italy.

<sup>2</sup>IRCCS SDN, Via Gianturco 113, Naples, 80143, Italy

\*Correspondence: antonella.accardo@unina.it; Tel.: +390812532045

<sup>†</sup>These authors contributed equally to this work.

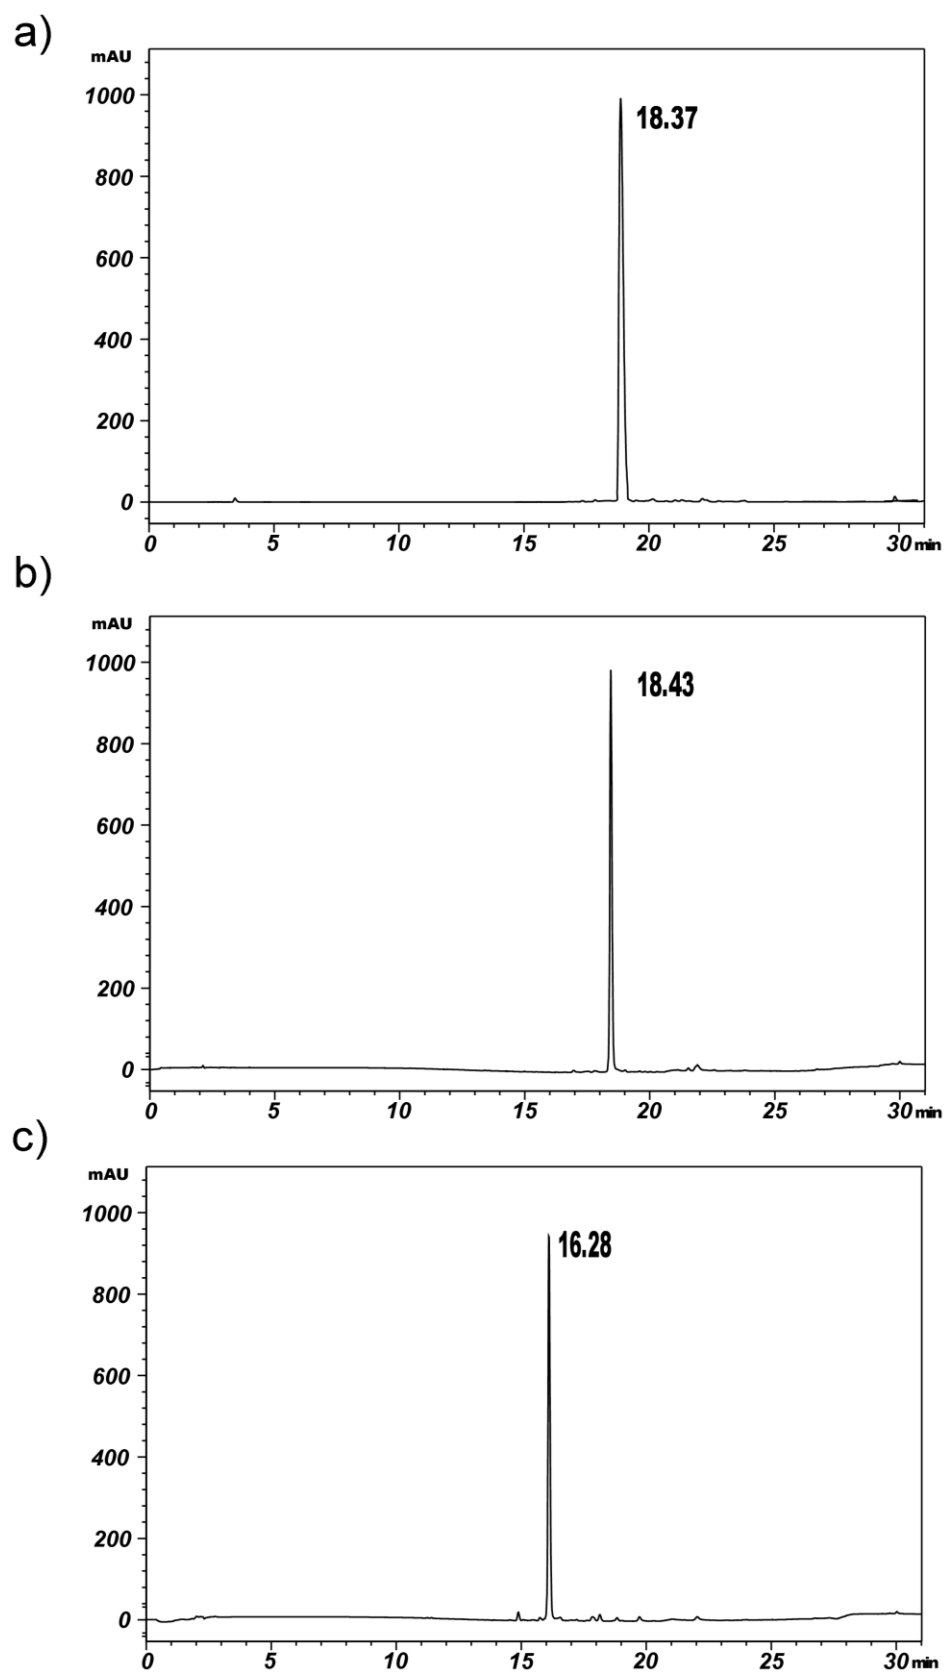

**Figure S1:** RP-HPLC chromatograms for Fmoc-K1, Fmoc-K2 and Fmoc-K3 peptides.

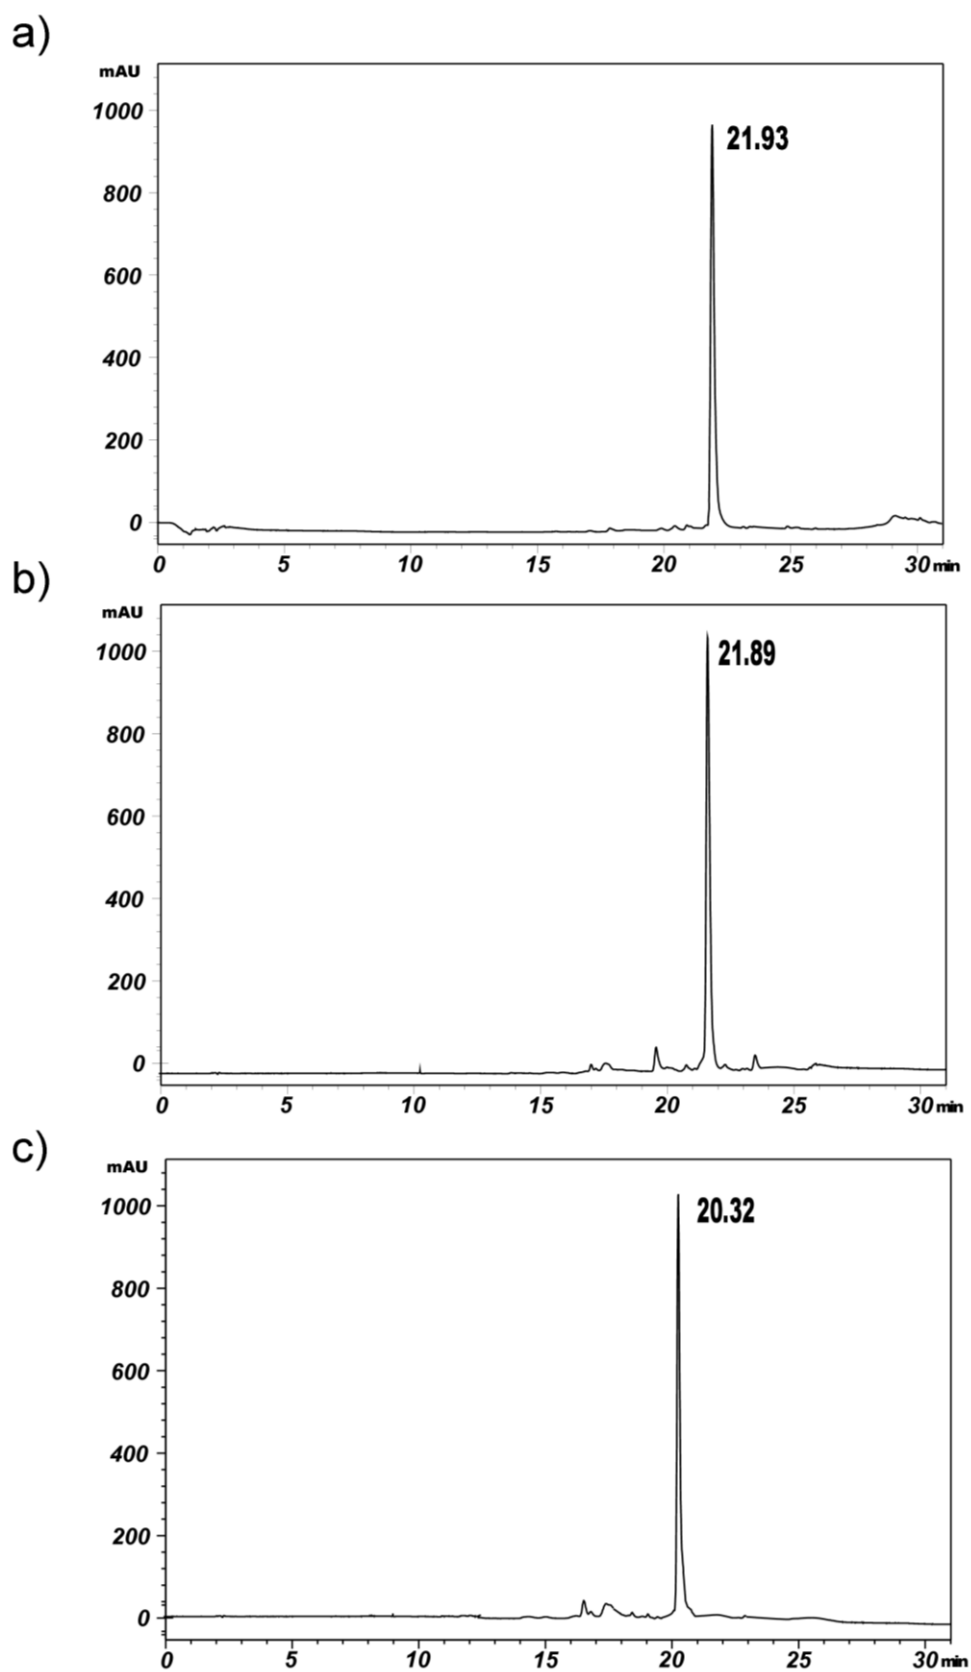

**Figure S2:** RP-HPLC chromatograms for Fmoc-K1, Fmoc-K2 and Fmoc-K3 peptides.

a)

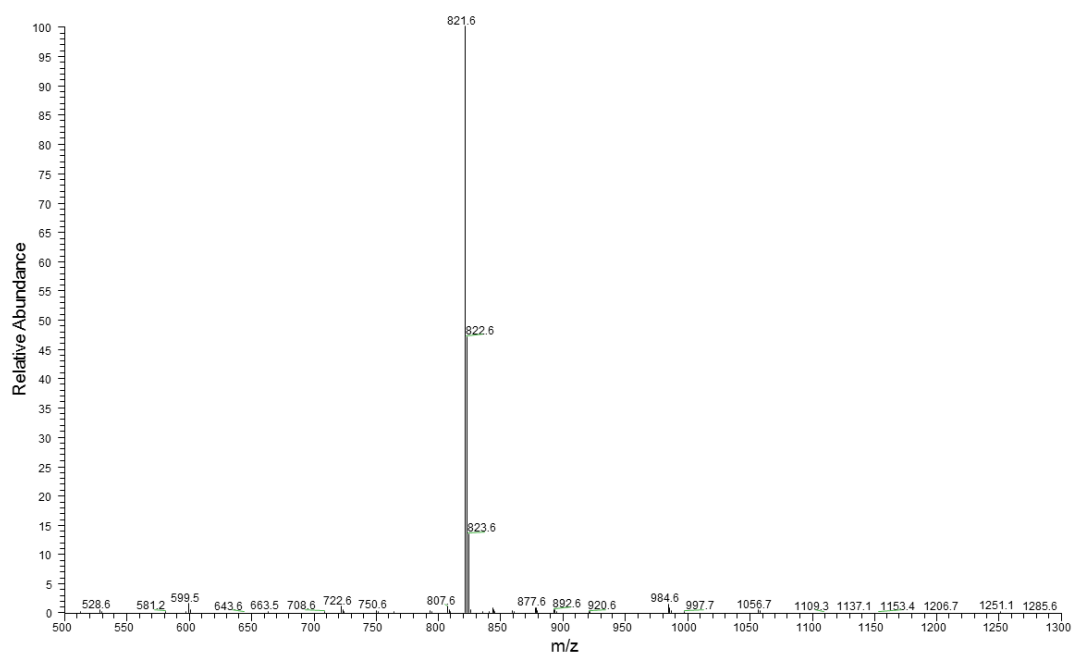

b)

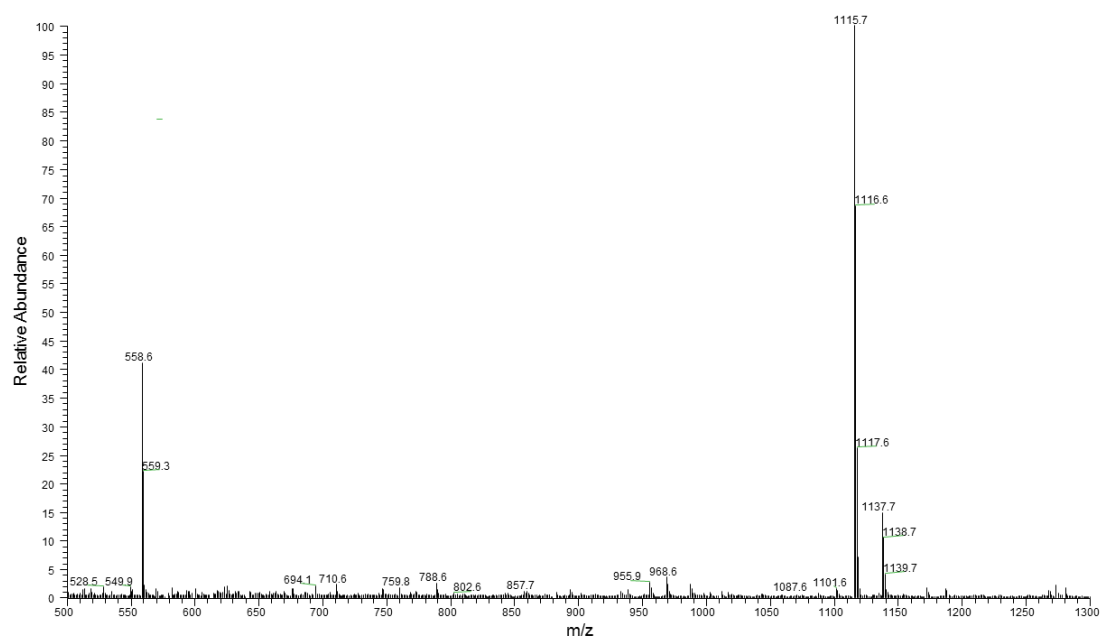

**Figure S3:** ESI mass spectra of Fmoc-K1 and FmocFF-K1 peptides

a)

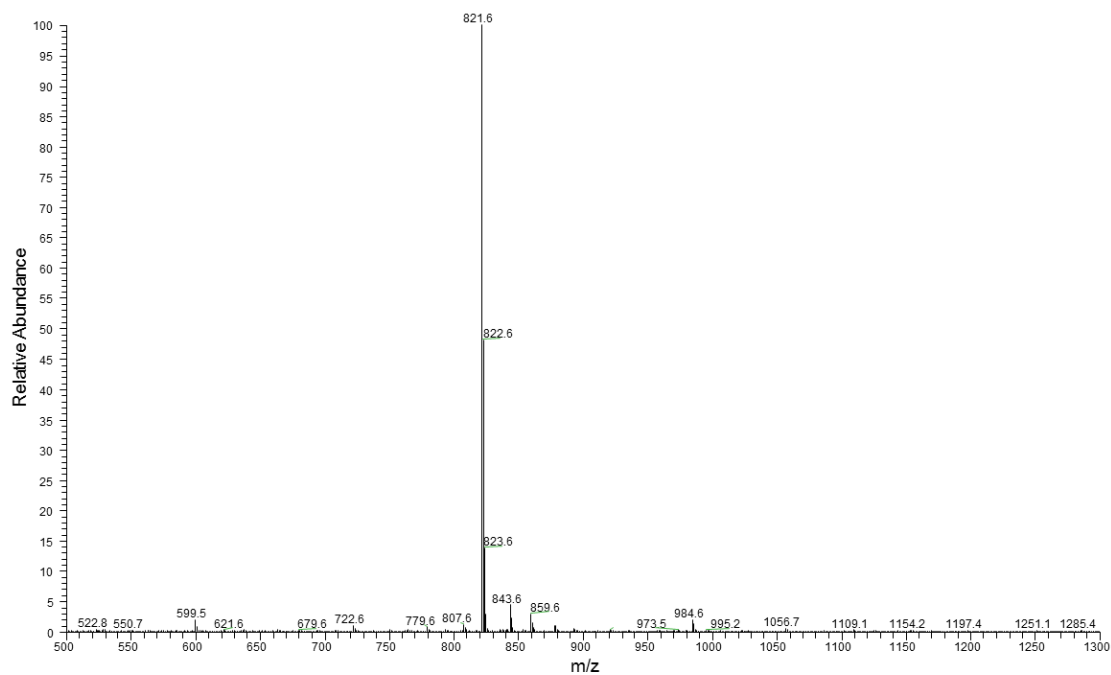

b)

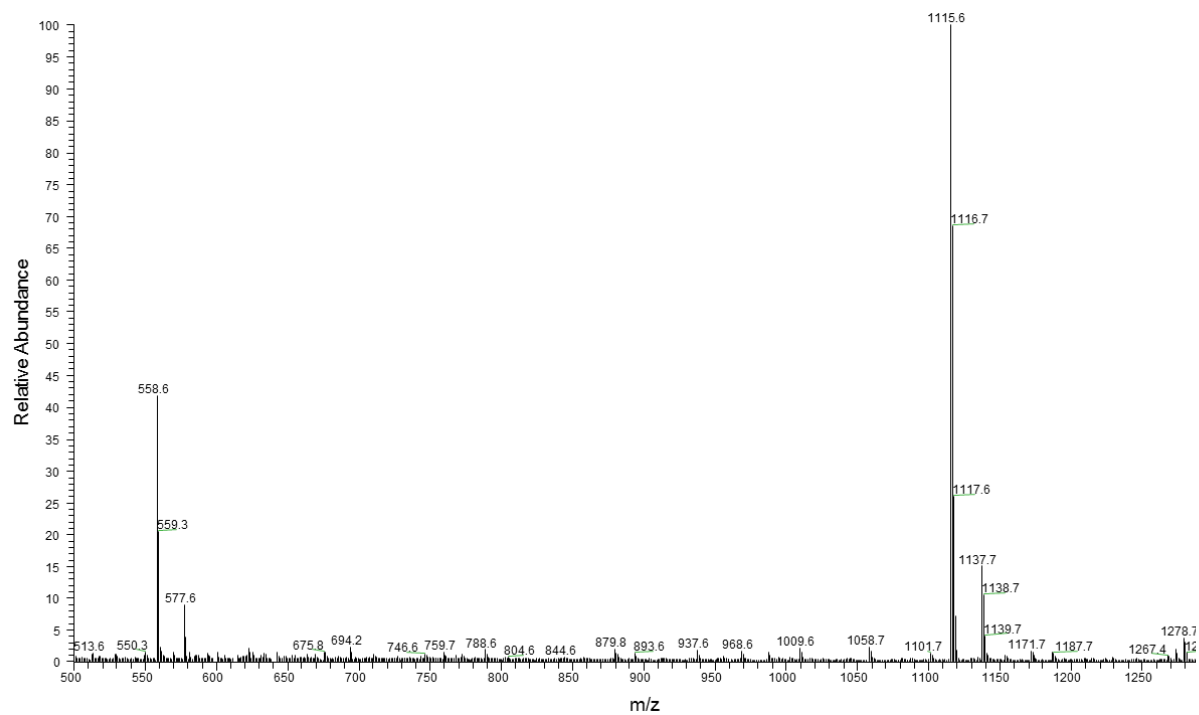

**Figure S4:** ESI mass spectra of Fmoc-K2 and FmocFF-K2 peptides

a)

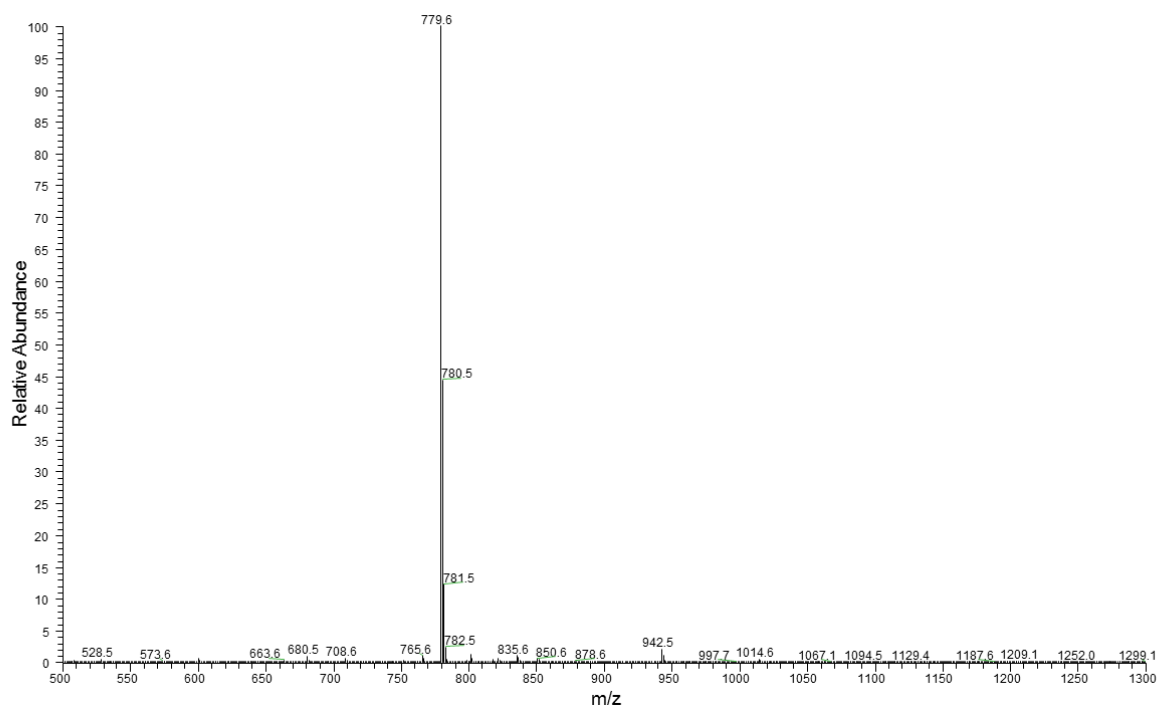

b)  
)

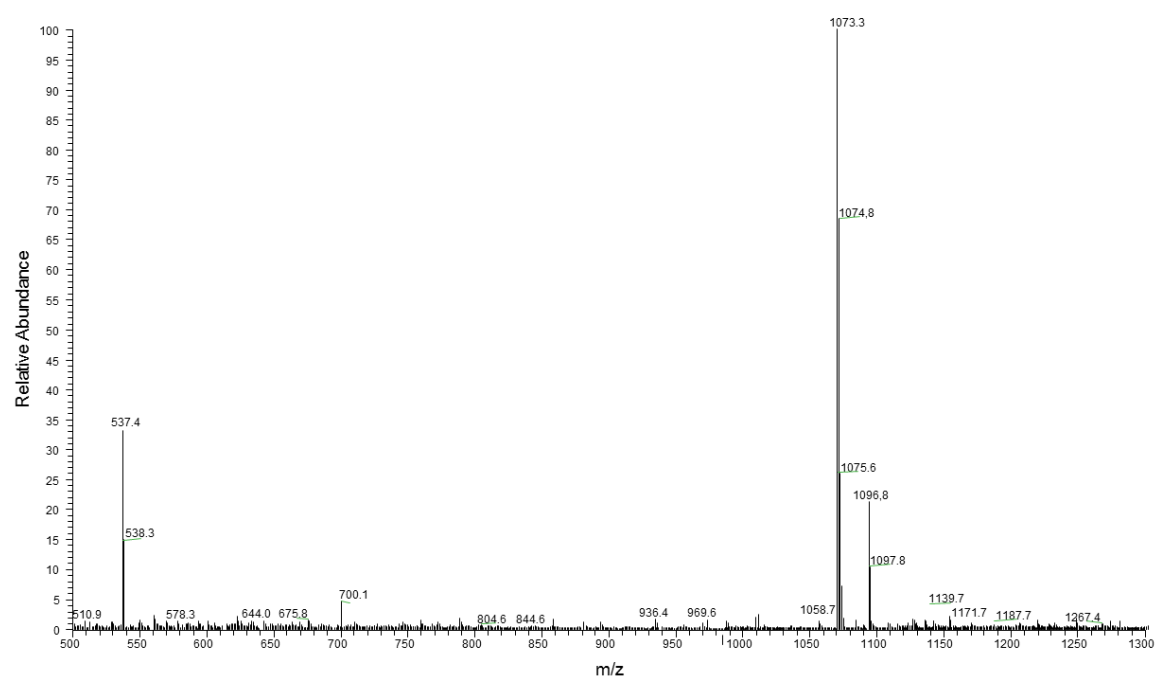

**Figure S5:** ESI mass spectra of Fmoc-K3 and FmocFF-K3 peptides

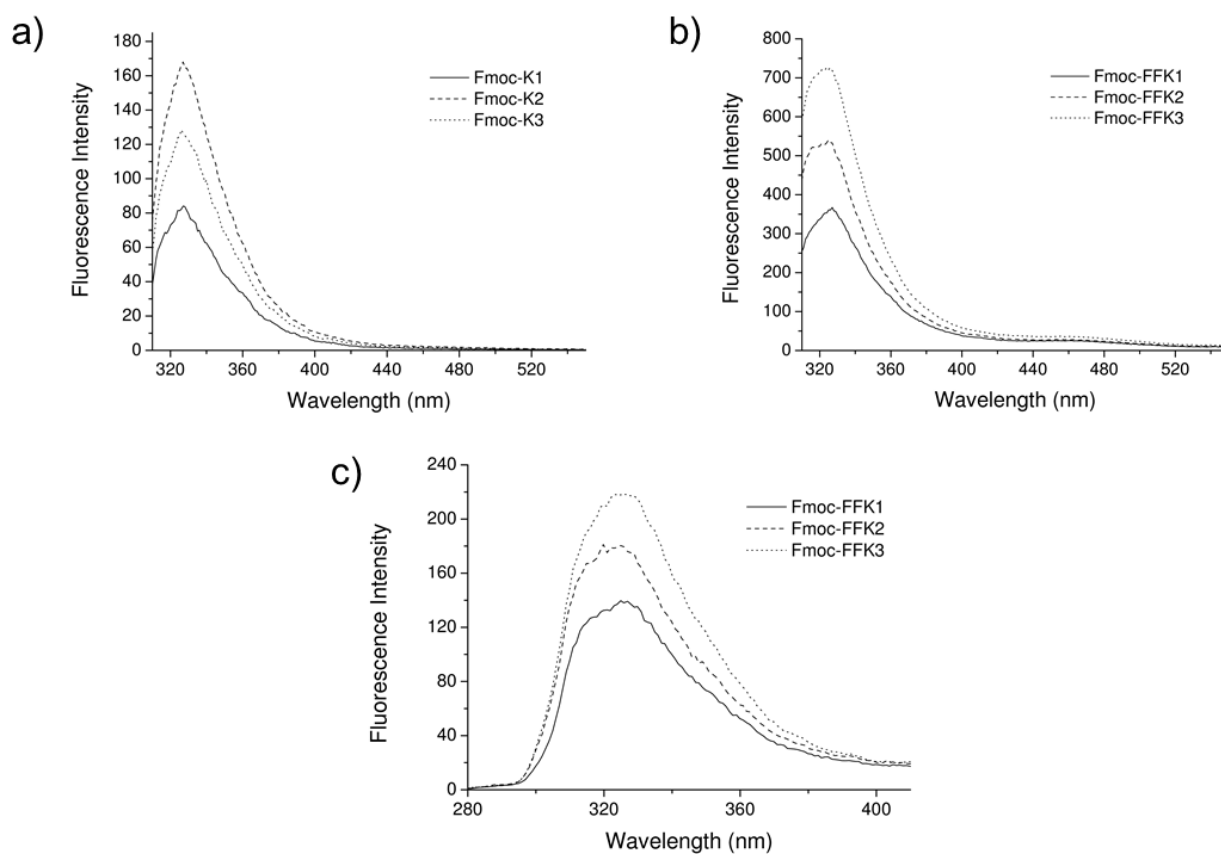

**Figure S6:** Fluorescence spectra of peptides excited at 301 nm (a, b) and at 257 nm (c).
